# Supplementary material for: VTBuilder: a tool for the assembly of multi isoform transcriptomes
Source: PubMed Central journal article supplement (PMC4260244; doi:10.1186/s12859-014-0389-8), 2014-12-03

SVMP III

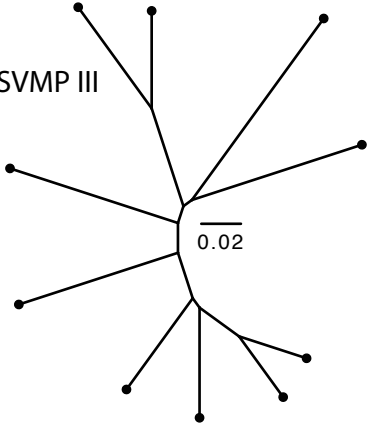

SP

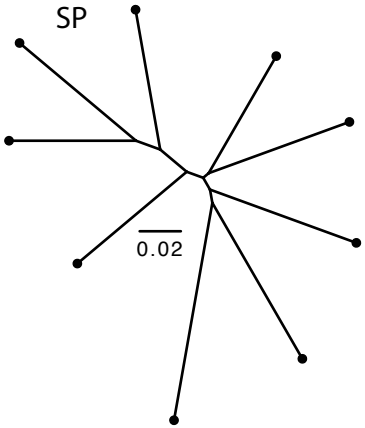

CTL

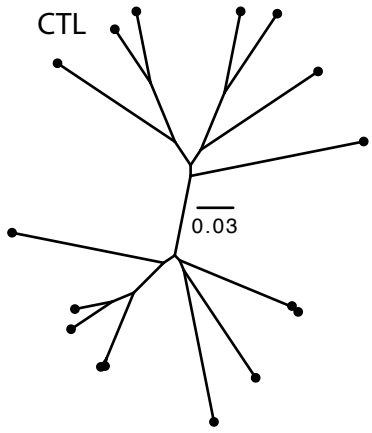

PLA2

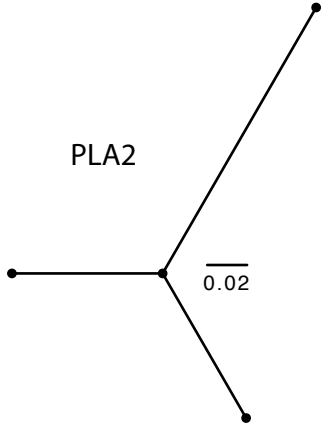

SVMP II

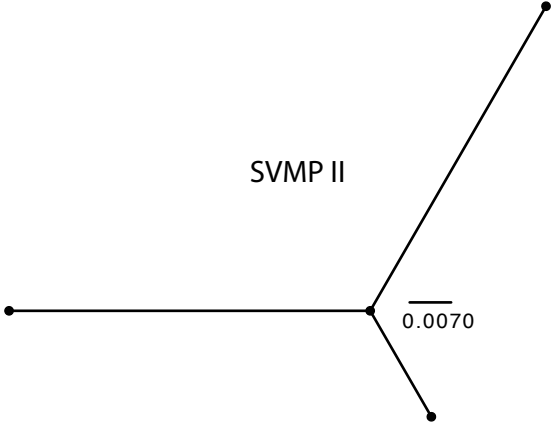

Supplement: 12859_2014_389_MOESM1_ESM.pdf [file 12859_2014_389_MOESM1_ESM.pdf]
