# Supplementary material for: VTBuilder: a tool for the assembly of multi isoform transcriptomes
Source: PubMed Central journal article supplement (PMC4260244; doi:10.1186/s12859-014-0389-8), 2014-12-03

**Trinity**

**VTBuilder**

**Total No.**

61709

1481

**Mean Len.**

440

751

**Median Len.**

297

580

**Range (Len.)**

201 to 8815

300 to 5598

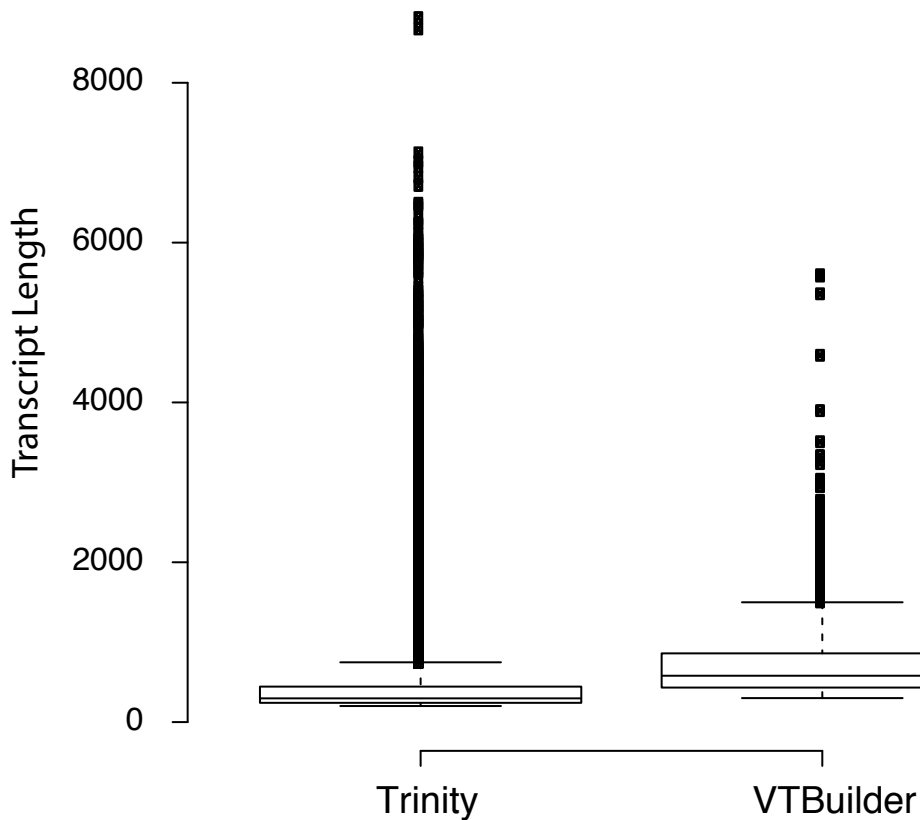

Supplement: 12859_2014_389_MOESM3_ESM.pdf [file 12859_2014_389_MOESM3_ESM.pdf]
